# Supplementary material for: Antimicrobial Activity of Catechol-Containing Biopolymer Poly[3-(3,4-dihydroxyphenyl)glyceric Acid] from Different Medicinal Plants of Boraginaceae Family
Source: Antibiotics (Basel). 2023 Feb 1;12(2):285. doi: 10.3390/antibiotics12020285 (PMC9952037; doi:10.3390/antibiotics12020285)
Supplement: Supplementary file 1 [file antibiotics-12-00285-s001.zip › antibiotics-2079230-supplementary.pdf]

## Supplementary materials

UV spectra were recorded on a Hitachi 150-20 spectrophotometer. IR spectra were registered in KBr pellets on a Perkin-Elmer 571 spectrophotometer. NMR spectra were taken on a Bruker DRX-500 spectrometer for 1% solutions of the polymers in D<sub>2</sub>O at 70-80°C using acetone ( $\delta$ H 2.225 ppm,  $\delta$ C 31.45 ppm) as the internal standard (sealed tubes).

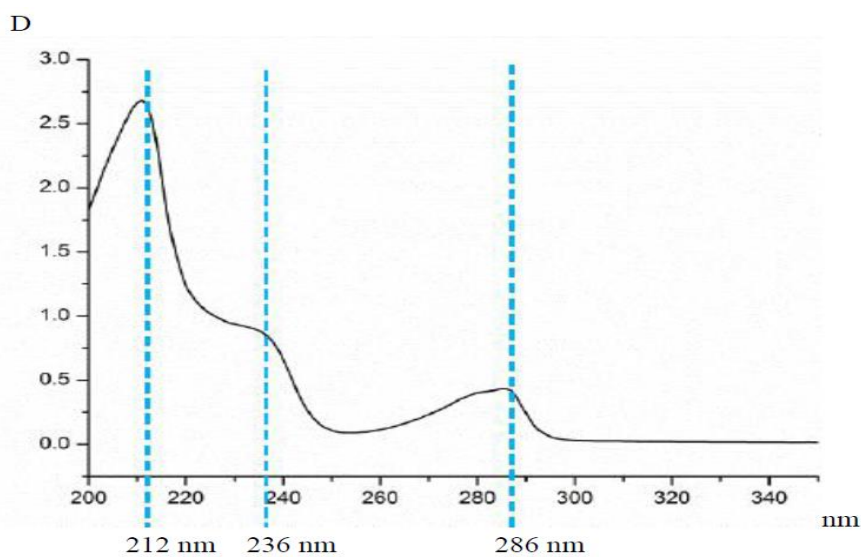

Figure S1. UV spectra (H<sub>2</sub>O,  $\lambda_{\text{max}}$ , nm) of PDHPGA-SA, PDHPGA-SC, PDHPGA-SG, PDHPGA-AI, PDHPGA-CO and PDHPGA-BO

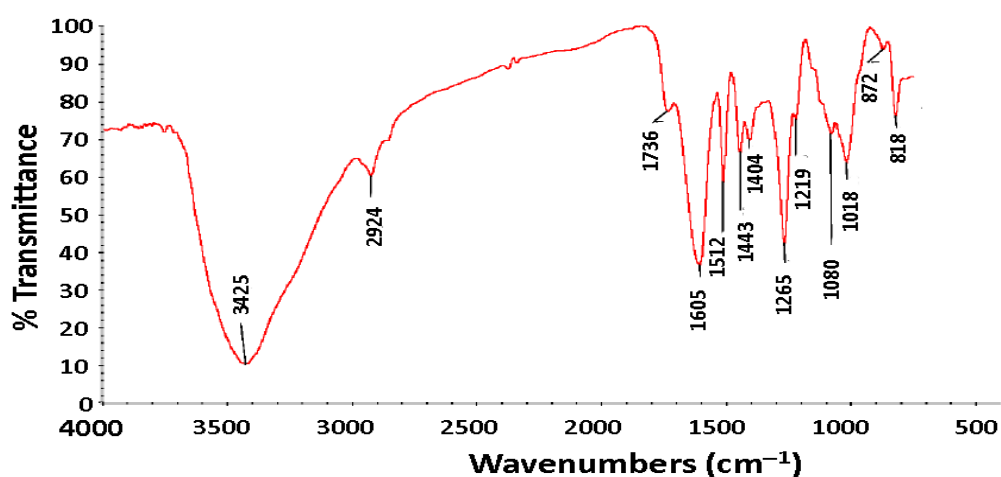

Figure S2. The IR spectra of PDHPGA-SA, PDHPGA-SC, PDHPGA-SG, PDHPGA-AI, PDHPGA-CO and PDHPGA-BO.

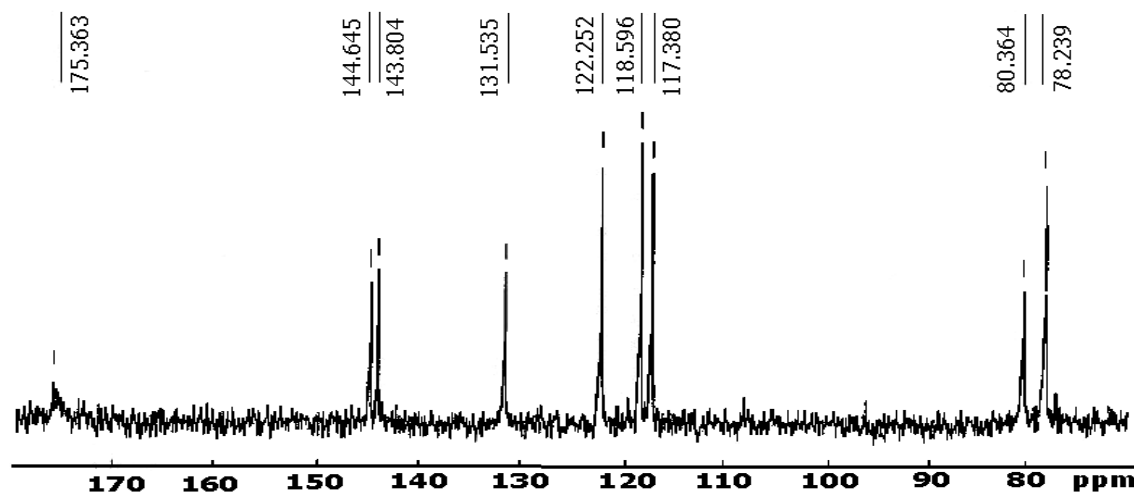

Figure S3. The  $^{13}\text{C}$  NMR spectrum of PDHPGA-SA, PDHPGA-SC and PDHPGA-CO.

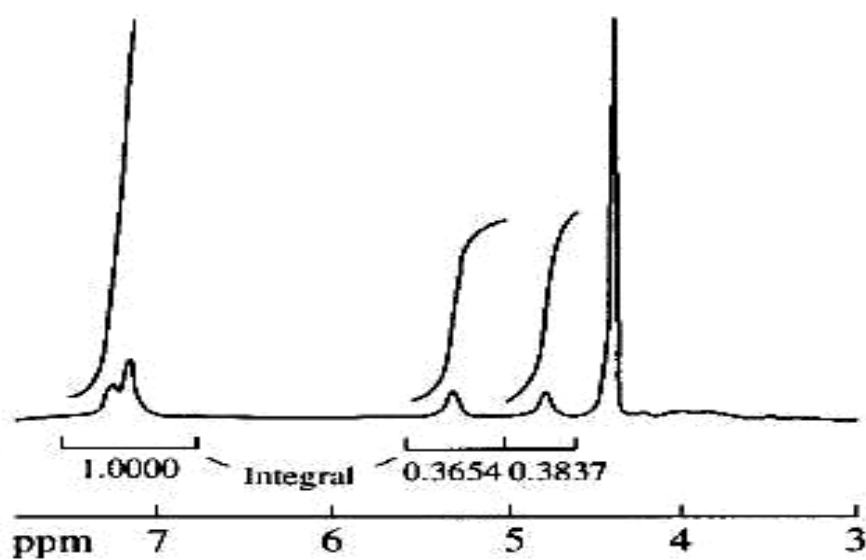

Figure S4. The  $^1\text{H}$  NMR spectrum of PDHPGA-SA, PDHPGA-SC and PDHPGA-CO.

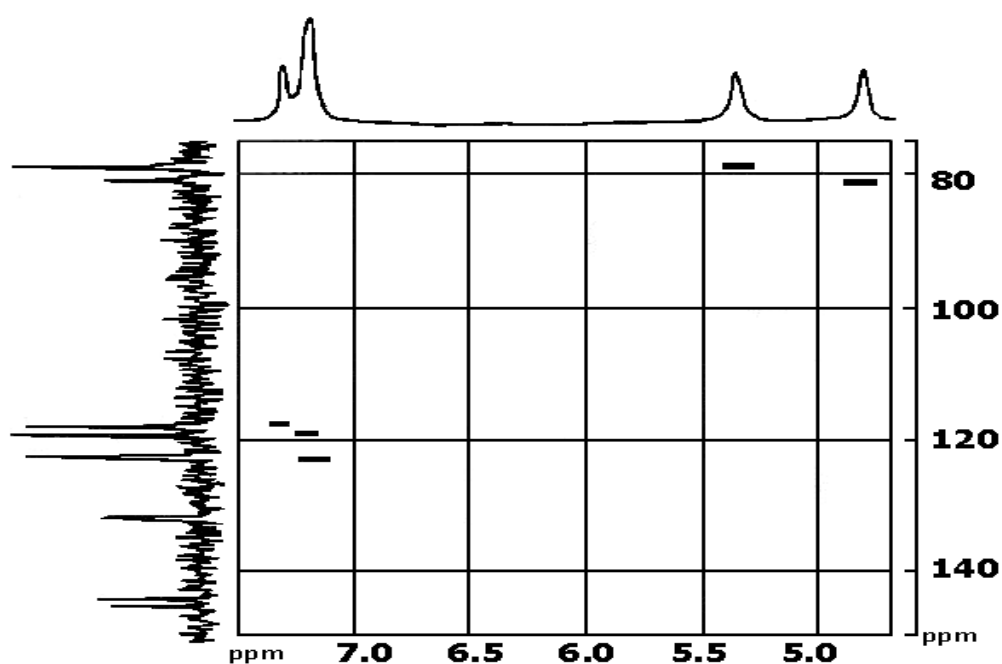

Figure S5. The HSQC spectrum of PDHPGA-SA, PDHPGA-SC and PDHPGA-CO.

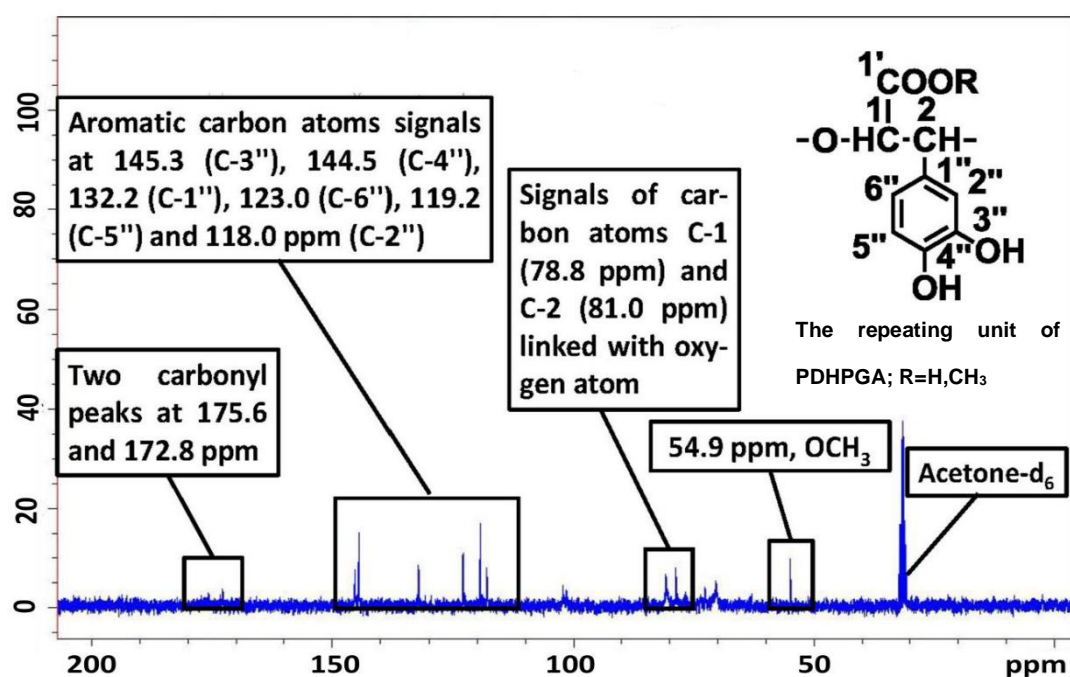

Figure S6. The <sup>13</sup>C NMR spectrum methylated in carboxylic groups of PDHPGA-SG, PDHPGA-AI and PDHPGA-BO.

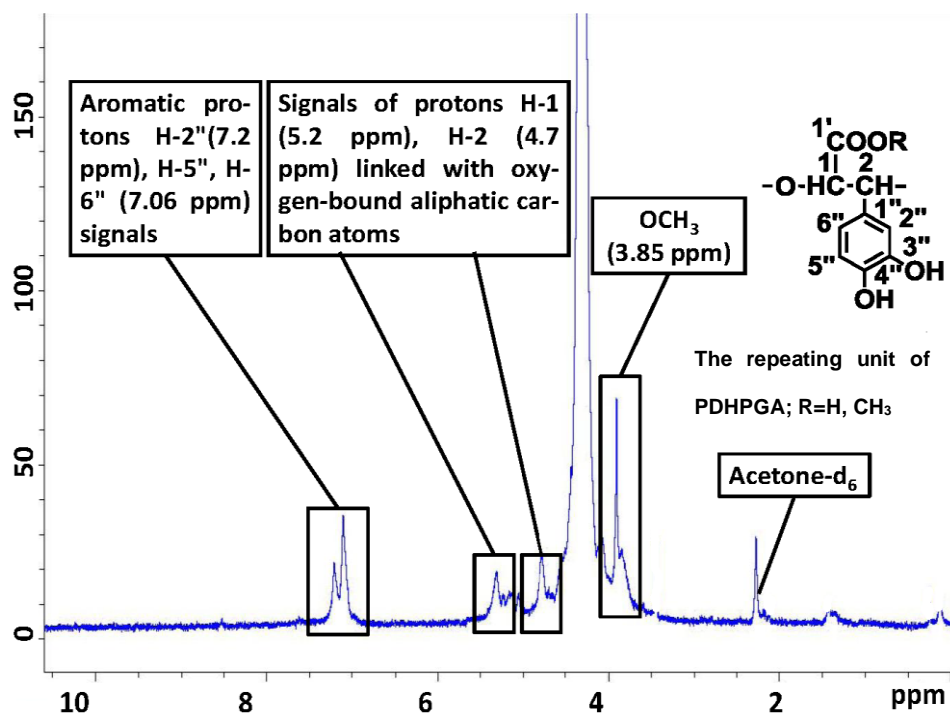

Figure S7. The  $^1\text{H}$  NMR spectrum of methylated in carboxylic groups of PDHPGA-SG, PDHPGA-AI and PDHPGA-BO.

Table S1. Signals assignments of the  $^{13}\text{C}$  and  $^1\text{H}$  NMR spectra of PDHPGA-SA, PDHPGA-SC, PDHPGA-CO, PDHPGA-SG, PDHPGA-AI and PDHPGA-BO

|                                                                                                                                                                                                 | C atom no. | <sup>13</sup> C chemical shift, δC, ppm | <sup>1</sup> H chemical shift, δH, ppm |
|-------------------------------------------------------------------------------------------------------------------------------------------------------------------------------------------------|------------|-----------------------------------------|----------------------------------------|
| 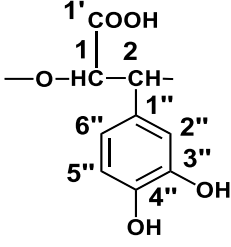 <p>The repeating unit of PDHPGA.</p>                                                                          | 1'         | 175.4                                   |                                        |
|                                                                                                                                                                                                 | 1          | 78.2                                    | 5.3                                    |
|                                                                                                                                                                                                 | 2          | 80.4                                    | 4.9                                    |
|                                                                                                                                                                                                 | 1''        | 131.5                                   |                                        |
|                                                                                                                                                                                                 | 2''        | 117.4                                   | 7.2                                    |
|                                                                                                                                                                                                 | 3''        | 144.7                                   |                                        |
|                                                                                                                                                                                                 | 4''        | 143.8                                   |                                        |
|                                                                                                                                                                                                 | 5''        | 118.6                                   | 7.1                                    |
|                                                                                                                                                                                                 | 6''        | 122.3                                   | 7.1                                    |
| 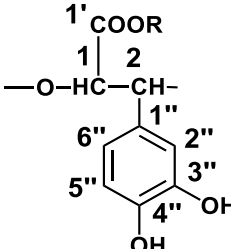 <p>The repeating unit of PDHPGA (R=H) and methylated in carboxylic groups of PDHPGA (R=CH<sub>3</sub>).</p> | 1'         | 175.6 (C=O)                             |                                        |
|                                                                                                                                                                                                 | 1          | 172.8 (C=OCH <sub>3</sub> )             |                                        |
|                                                                                                                                                                                                 |            | 54.9 (OCH <sub>3</sub> )                | 3.85 (OCH <sub>3</sub> )               |
|                                                                                                                                                                                                 | 1          | 78.8                                    | 5.2                                    |
|                                                                                                                                                                                                 | 2          | 81.0                                    | 4.7                                    |
|                                                                                                                                                                                                 | 1''        | 132.2                                   |                                        |
|                                                                                                                                                                                                 | 2''        | 118.0                                   | 7.2                                    |
|                                                                                                                                                                                                 | 3''        | 145.3                                   |                                        |
|                                                                                                                                                                                                 | 4''        | 144.5                                   |                                        |
|                                                                                                                                                                                                 | 5''        | 119.2                                   | 7.1                                    |
|                                                                                                                                                                                                 | 6''        | 123.0                                   | 7.1                                    |

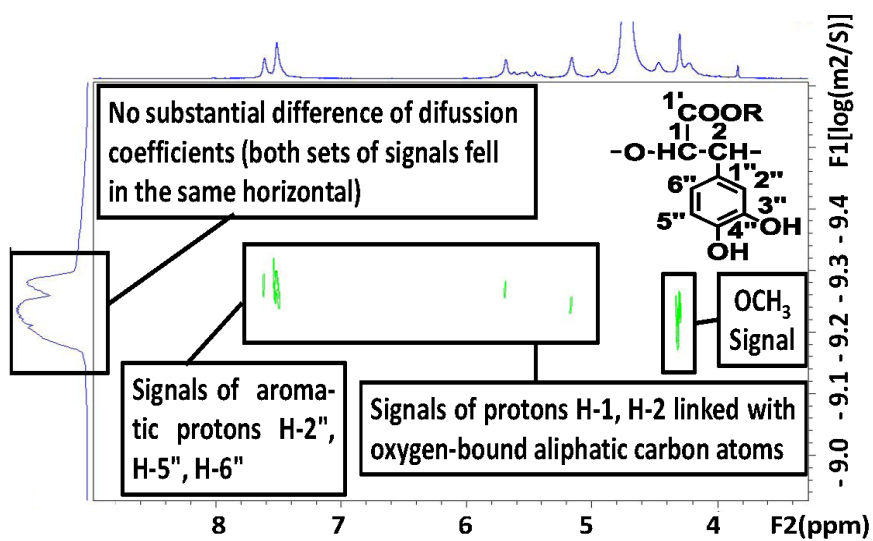

Figure S8. The 2D DOSY spectrum of PDHPGA (R=H) and methylated in carboxylic groups of PDHPGA (R=CH<sub>3</sub>)
